# Supplementary material for: Differences in Facial Emotion Recognition between First Episode Psychosis, Borderline Personality Disorder and Healthy Controls
Source: PubMed Central journal article supplement (PMC4965014; doi:10.1371/journal.pone.0160056), 2016-07-28
Supplement: pone.0160056.s001.pdf [file pone.0160056.s001.pdf]

**Table 1. Socio-demographic variables.**

| <i>Variable</i>             | <i>Group</i>                |                             |                          |
|-----------------------------|-----------------------------|-----------------------------|--------------------------|
|                             | <i>FEP patients (n= 69)</i> | <i>BPD patients (n= 40)</i> | <i>Controls (n= 148)</i> |
| Age, mean (SD)              | 35.4 (12.6)                 | 35.9 (10.3)                 | 33.1 (11.3)              |
| Gender, n (%)*              |                             |                             |                          |
| Male                        | 44 (63.8%)                  | 12 (30%)                    | 87 (58.8%)               |
| Female                      | 25 (36.2%)                  | 28 (70%)                    | 61 (41.2%)               |
| Education years, mean (SD)* | 15.4 (3.2)                  | 16.5 (2.7)                  | 17.8 (2.4)               |
| Partnership status, n (%)*  |                             |                             |                          |
| Single                      | 41 (59.5%)                  | 23 (59%)                    | 81 (54.7%)               |
| Married/stable partnership  | 19 (27.5%)                  | 11 (28.2%)                  | 64 (43.2%)               |
| Divorced/separated          | 7 (10.1%)                   | 5 (12.8%)                   | 3 (2.1%)                 |
| Widowed                     | 2 (2.9%)                    | 0                           | 0                        |
| Housing, n (%)*             |                             |                             |                          |
| With original family        | 38 (55%)                    | 18 (46.2%)                  | 63 (42.6%)               |
| With own family             | 20 (29%)                    | 13 (33.3%)                  | 75 (50.7%)               |
| Alone                       | 11 (16%)                    | 8 (20.5%)                   | 10 (6.7%)                |
| Employment status, n (%)**  |                             |                             |                          |
| Full-time employment        | 33 (47.8%)                  | 8 (20.5%)                   | 84 (56.8%)               |
| Unemployed                  | 29 (42%)                    | 27 (69.3%)                  | 19 (12.8%)               |
| Student                     | 5 (7.3%)                    | 1 (2.5%)                    | 40 (27%)                 |
| Retired                     | 2 (2.9%)                    | 0                           | 2 (1.4%)                 |
| Other                       | 0                           | 3 (7.7%)                    | 3 (2%)                   |
| IQ, mean (SD)**             | 93.1 (15.9)                 | 91.2 (14.6)                 | 110.6 (14.4)             |

\*p&lt; 0.05

\*\*p=0.0001
