# Supplementary material for: Differences in Facial Emotion Recognition between First Episode Psychosis, Borderline Personality Disorder and Healthy Controls
Source: PubMed Central journal article supplement (PMC4965014; doi:10.1371/journal.pone.0160056), 2016-07-28
Supplement: pone.0160056.s002.pdf [file pone.0160056.s002.pdf]

**Table 2. Clinical variables.**

|                         | FEP patients (n=69) | BPD patients (n=40) | Controls (n=148) |
|-------------------------|---------------------|---------------------|------------------|
|                         | mean (SD)           | mean (SD)           | mean (SD)        |
| PANSS positive symptoms | 20.5 (5.9)          |                     |                  |
| PANSS negative symptoms | 12 (8.2)            |                     |                  |
| PANSS disorganized      | 10.7 (3.9)          |                     |                  |
| GAF score               | 56.6 (17.3)         |                     |                  |
| CAPE positive           |                     | 11.8 (7.9)          | 4 (2.6)          |
| CAPE negative           |                     | 15.3 (7.5)          | 6.7 (4.2)        |
| CAPE depressive         |                     | 12.7 (5.8)          | 4.7 (2.4)        |
| SIS-R positive          |                     |                     | 1.5 (1.6)        |
| SIS-R negative          |                     |                     | 1.5 (1.3)        |
| SIS-R disorganized      |                     |                     | 0.01 (0.1)       |
