# Supplementary material for: Differences in Facial Emotion Recognition between First Episode Psychosis, Borderline Personality Disorder and Healthy Controls
Source: PubMed Central journal article supplement (PMC4965014; doi:10.1371/journal.pone.0160056), 2016-07-28
Supplement: pone.0160056.s003.pdf [file pone.0160056.s003.pdf]

**Table 3. Comparison of the percentage of correct answer of emotion recognition in FEP, BPD and HC. Unadjusted and adjusted analyses.**

| Unadjusted analyses |                          |                         |                            |                     |            |
|---------------------|--------------------------|-------------------------|----------------------------|---------------------|------------|
| Emotion recognition | FEP <sup>a</sup> (N=69)  | BPD <sup>b</sup> (N=40) | HC <sup>c</sup> (N=148)    | Kruskal-Wallis test |            |
|                     | mean (SD)                | mean (SD)               | mean (SD)                  | $\chi^2_{(df=2)}$   | p-value    |
| Neutral             | 78.9 (16.2) <sup>c</sup> | 74.5 (14) <sup>c</sup>  | 84.1 (11.8) <sup>a,b</sup> | 15.54               | 0.0004     |
| Happiness           | 88.6 (11.2)              | 86.4 (13.3)             | 90.8 (9.6)                 | 4.20                | 0.1225     |
| Fear                | 50.8 (19.8)              | 54.4 (18.4)             | 53 (19.5)                  | 1.26                | 0.5317     |
| Anger               | 59.1 (21.9) <sup>c</sup> | 65.2 (20.6)             | 68.2 (21.7) <sup>a</sup>   | 7.63                | 0.0220     |
| Recognition         | 69.4 (11.4) <sup>c</sup> | 70.1 (10.2)             | 74 (9.7) <sup>a</sup>      | 12.80               | 0.0017     |
| Adjusted analyses*  |                          |                         |                            |                     |            |
| Emotion recognition | FEP (N=69)               | BPD (N=40)              | HC (N=148)                 | p-value             |            |
|                     | $\beta$                  | $\beta$                 | $\beta$                    | FEP vs. HC          | BPD vs. HC |
| Neutral             | -4.91                    | -8.75                   | Ref.                       | 0.0301              | 0.0014     |
| Happiness           | -1.26                    | -3.53                   | Ref.                       | 0.4757              | 0.0991     |
| Fear                | 0.21                     | 2.01                    | Ref.                       | 0.9474              | 0.6028     |
| Anger               | -8.63                    | -2.78                   | Ref.                       | 0.0171              | 0.5208     |
| Recognition         | -3.65                    | -3.26                   | Ref.                       | 0.0322              | 0.1111     |

<sup>a,b,c</sup> Superscript letters indicate significant differences among groups by Scheffe test for multiple comparison.

\* Comparison of the percentage of correct answer of emotion recognition between groups adjusting for WAIS, age and sex by means of the general linear models.

SD: standard deviation; df: degrees of freedom;  $\beta$ : beta parameter estimated from the general linear model, considering the healthy controls (HC) as reference group; Ref: Reference group.
