# Supplementary material for: Differences in Facial Emotion Recognition between First Episode Psychosis, Borderline Personality Disorder and Healthy Controls
Source: PubMed Central journal article supplement (PMC4965014; doi:10.1371/journal.pone.0160056), 2016-07-28
Supplement: pone.0160056.s004.pdf [file pone.0160056.s004.pdf]

**Table 4. Comparison of the percentage of subjects' attribution when they failed in FEP, BPD and HC.**

|                  | FEP <sup>a</sup>         | BPD <sup>b</sup>         | HC <sup>c</sup>          | Kruskal-Wallis test |         |
|------------------|--------------------------|--------------------------|--------------------------|---------------------|---------|
|                  | mean (SD)                | mean (SD)                | mean (SD)                | $\chi^2_{(df=2)}$   | p-value |
| Neutral          |                          |                          |                          |                     |         |
| Happiness        | 10.3 (10.3)              | 12.3 (11.5)              | 11.3 (11.4)              | 0.77                | 0.6789  |
| Negative valence | 6.9 (8.4)                | 10.2 (10.2) <sup>c</sup> | 5.6 (7.5) <sup>b</sup>   | 7.84                | 0.0198  |
| Happiness        |                          |                          |                          |                     |         |
| Neutral          | 6 (7)                    | 6.8 (7.3)                | 7.2 (7.7)                | 1.13                | 0.5688  |
| Negative valence | 3.2 (5.5) <sup>c</sup>   | 4 (6.8) <sup>c</sup>     | 1.3 (3.7) <sup>a,b</sup> | 16.41               | 0.0003  |
| Fear             |                          |                          |                          |                     |         |
| Neutral          | 33.9 (13.5) <sup>c</sup> | 35 (14.6)                | 40.7 (15.2) <sup>a</sup> | 11.08               | 0.0039  |
| Happiness        | 3.3 (7.2) <sup>c</sup>   | 2.1 (3.2)                | 1.4 (3.3) <sup>a</sup>   | 10.35               | 0.0057  |
| Anger            | 4.3 (6.6)                | 3.1 (4.9)                | 4.3 (6.3)                | 0.73                | 0.6941  |
| Anger            |                          |                          |                          |                     |         |
| Neutral          | 18 (13.2)                | 13.1 (9.7)               | 17.1 (13.7)              | 3.13                | 0.2094  |
| Happiness        | 2.6 (4.4)                | 3.2 (4.7)                | 3 (5.4)                  | 0.89                | 0.6405  |
| Fear             | 11.4 (10.7) <sup>c</sup> | 10.4 (10.6)              | 8.2 (10.4) <sup>a</sup>  | 7.74                | 0.0209  |

<sup>a,b,c</sup> Superscript letters indicate significant differences among groups by Scheffe test for multiple comparison.  
SD: standard deviation; df: degrees of freedom.
